# Supplementary material for: Disentangling the effects of vegetation and water on the satellite observations of soil organic carbon stocks in western European topsoils
Source: Copernicus journal article supplement (doi:10.5194/bg-2023-170), 2023-10-11
Supplement: Supplementary file [file bg-2023-170-AC2-supplement.zip]

# Certificate of Editing

Edited provisional title

Disentangling the effects of vegetation and water on the satellite observations of soil organic carbon stocks in western European topsoils

Client name and institution

Lixin Lin, Xixi Liu, School of Remote Sensing and Geomatics Engineering, Nanjing University of Information Science and Technology, Nanjing, 210044, China. College of Information Science and Engineering, Key Laboratory of Grain Information Processing and Control Ministry of Education, Henan University of Technology, Zhengzhou, 450001, China.

Date Completed  
2023-12-18

Identification code  
605642

Certificate issued by  
Edanz Editing China

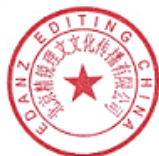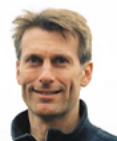

Expert Editor: James Buxton  
1983-BSc (Hons) Oceanography and  
Meteorology  
Plymouth University  
Atmospheric Sciences, Other Earth Sciences, Earth  
Sciences

[www.liwenbianji.cn](http://www.liwenbianji.cn)

While this certificate confirms the authors have used Edanz's editing services, we cannot guarantee that additional changes have not been made after our edits.
